# Supplementary material for: Oestrogen receptor negative breast cancers exhibit high cytokine content
Source: PubMed Central journal article supplement (PMC1851386; doi:10.1186/bcr1648), 2007-01-29

Comparison between Elisa And Bioplex results for IL-8

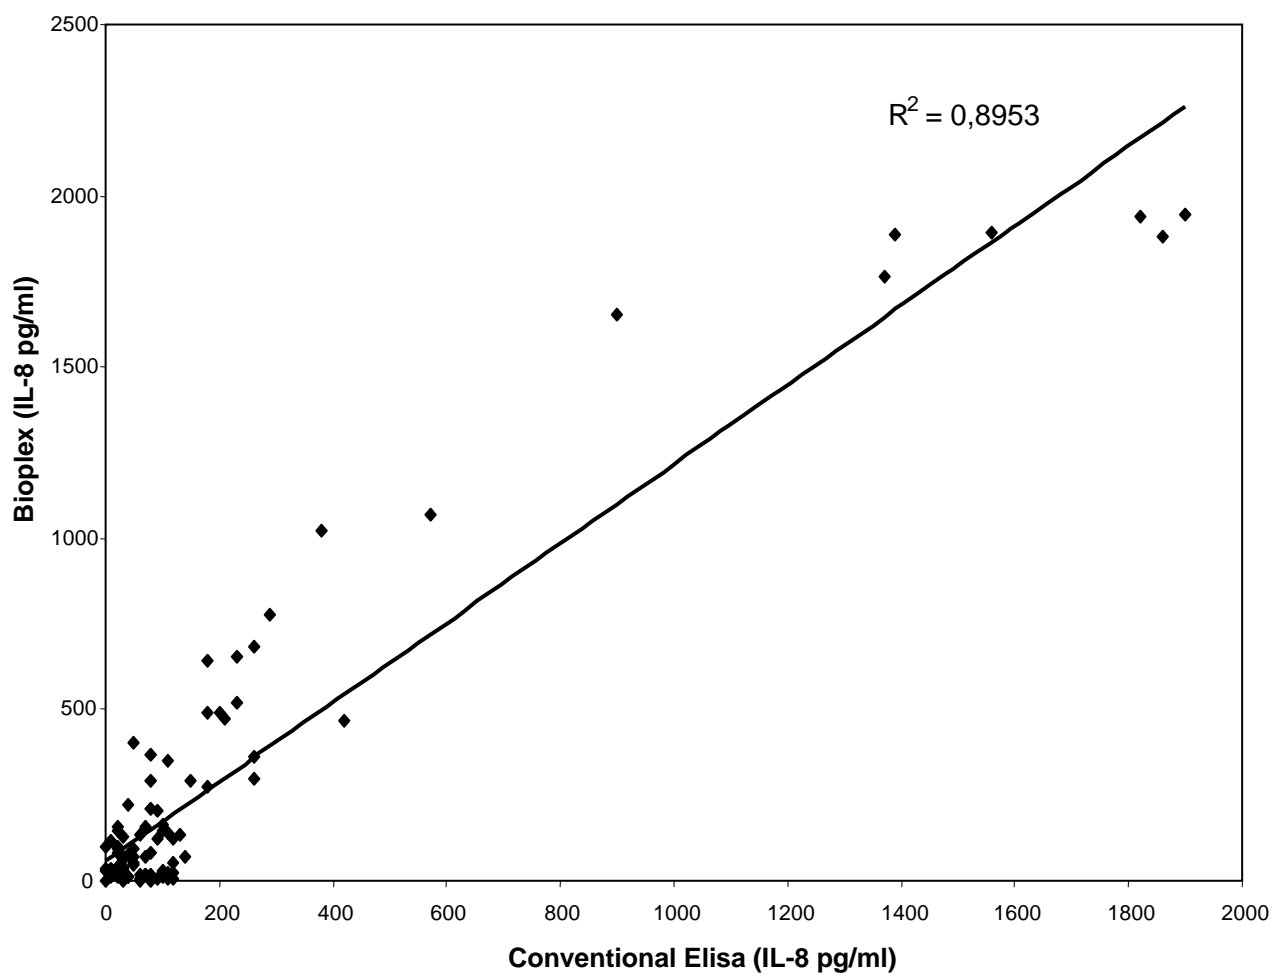

Supplement: bcr1648-S3.pdf [file bcr1648-S3.pdf]
