# Supplementary material for: Oestrogen receptor negative breast cancers exhibit high cytokine content
Source: PubMed Central journal article supplement (PMC1851386; doi:10.1186/bcr1648), 2007-01-29
Supplement: bcr1648-S4.pdf [file bcr1648-S4.pdf]

| Patient | AGE | GRADE | SIZE | N  | ER  | PR  | HER-2 | hIL-1b | hIL-2 | hIL-4 | hIL-5 | hIL-6    | hIL-7 | hIL-8    | hIL-10 | hIL-12 | hIL-13 | hIL-17 | hGF-CSF | hGM-CSF | hIFN $\gamma$ | hMCP-1   | hMMP-1b  | hTNF $\alpha$ | AP-1 | CD3 | CD20 | CD68 |   |   |
|---------|-----|-------|------|----|-----|-----|-------|--------|-------|-------|-------|----------|-------|----------|--------|--------|--------|--------|---------|---------|---------------|----------|----------|---------------|------|-----|------|------|---|---|
| 1       | 49  | III   | T2   | N0 | neg | neg | 0     | 53.08  | 8.30  | 6.37  | 0.00  | 22.39    | 6.69  | 804.99   | 2.87   | 7.20   | 4.71   | 24.04  | 24.04   | 43.07   | 61.35         | 4927.73  | 1068.01  | 18.13         | pos  | 2   | 1    | 2    |   |   |
| 3       | 67  | II    | T3   | N1 | neg | neg | 3+    | 101.64 | 5.49  | 2.27  | 0.00  | 101.85   | 0.54  | 835.04   | 9.98   | 6.05   | 4.46   | 4.15   | 47.43   | 43.07   | 64.07         | 22451.66 | 3257.82  | 14.89         | pos  | 2   | 1    | 2    |   |   |
| 3       | 67  | I     | T2   | N0 | neg | neg | 0     | 7.14   | 0.87  | 6.23  | 0.00  | 13.38    | 0.23  | 3.93     | 0.40   | 2.34   | 3.93   | 0.42   | 14.32   | 0.00    | 26.78         | 277.33   | 2673.97  | 7.51          | neg  | 0   | 0    | 1    | 2 |   |
| 4       | 38  | III   | T1   | N0 | neg | neg | 0     | 17.17  | 2.89  | 4.87  | 0.00  | 3304.14  | 1.48  | 8628.85  | 1.31   | 4.13   | 4.53   | 2.72   | 31.72   | 10.84   | 43.10         | 830.17   | 1285.22  | 11.83         | pos  | 0   | 0    | 1    | 2 |   |
| 5       | 60  | III   | T1   | N1 | neg | neg | 0     | 2.34   | 1.16  | 2.70  | 0.00  | 1.16     | 0.03  | 1.16     | 0.03   | 1.16   | 0.03   | 1.16   | 0.03    | 1.16    | 0.03          | 1.16     | 0.03     | 1.16          | pos  | 1   | 1    | 1    | 2 |   |
| 6       | 58  | III   | T1   | N0 | neg | neg | 1+    | 6.13   | 2.32  | 0.00  | 0.00  | 29.50    | 1.57  | 289.74   | 0.96   | 3.11   | 3.86   | 0.35   | 27.20   | 0.00    | 26.40         | 192.93   | 4978.47  | 7.78          | pos  | 2   | 0    | 1    | 2 |   |
| 7       | 45  | III   | T2   | N0 | neg | neg | 0     | 14.40  | 1.74  | 2.36  | 0.00  | 129.27   | 0.67  | 493.25   | 2.01   | 3.75   | 4.30   | 0.35   | 27.99   | 0.00    | 33.78         | 4996.57  | 4011.84  | 15.07         | pos  | 1   | 1    | 1    | 2 |   |
| 8       | 49  | III   | T2   | N0 | neg | neg | 0     | 1.23   | 0.87  | 1.13  | 0.00  | 1.23     | 0.00  | 1.23     | 0.00   | 1.23   | 0.00   | 1.23   | 0.00    | 1.23    | 0.00          | 1.23     | 0.00     | 1.23          | pos  | 3   | 2    | 3    | 2 |   |
| 9       | 48  | III   | T2   | N0 | neg | neg | 0     | 14.48  | 5.20  | 6.55  | 0.00  | 26487.47 | 1.65  | 15890.60 | 0.64   | 3.24   | 4.43   | 0.01   | 79.18   | 85.31   | 91.26         | 8479.38  | 114.38   | 20.74         | pos  | 1   | 1    | 1    | 2 |   |
| 10      | 67  | III   | T2   | N1 | neg | neg | 0     | 0.00   | 0.00  | 3.93  | 0.00  | 48.97    | 0.76  | 31.52    | 0.11   | 1.58   | 3.93   | 0.00   | 16.58   | 0.00    | 25.23         | 46.30    | 460.90   | 6.43          | pos  | 1   | 0    | 2    | 2 |   |
| 11      | 52  | III   | T3   | N1 | neg | pos | 3+    | 2.48   | 1.16  | 3.72  | 0.00  | 19.71    | 1.66  | 386.33   | 0.38   | 2.47   | 3.53   | 0.49   | 17.03   | 0.00    | 28.34         | 175.84   | 731.32   | 6.70          | pos  | 0   | 0    | 2    | 2 |   |
| 12      | 65  | III   | T2   | N0 | neg | neg | 3+    | 0.00   | 0.29  | 0.00  | 0.00  | 69.94    | 0.00  | 219.89   | 0.11   | 1.19   | 4.33   | 0.00   | 11.83   | 0.00    | 89.12         | 1.35     | 1.99     | 6.25          | pos  | 1   | 1    | 1    | 2 |   |
| 13      | 81  | I     | T1   | N0 | neg | pos | 0     | 0.92   | 4.05  | 1.73  | 0.00  | 34.11    | 1.30  | 115.18   | 0.61   | 3.24   | 21.41  | 1.21   | 14.77   | 0.00    | 270.31        | 256.68   | 342.09   | 28.03         | pos  | 0   | 0    | 1    | 3 |   |
| 14      | 37  | III   | T2   | N1 | neg | pos | 0     | 11.28  | 6.65  | 5.92  | 0.00  | 49.20    | 2.33  | 124.81   | 4.43   | 5.15   | 14.85  | 5.52   | 14.20   | 0.00    | 72.23         | 3429.85  | 13287.59 | 18.58         | pos  | 3   | 3    | 3    |   |   |
| 15      | 49  | II    | T2   | N1 | neg | pos | 0     | 1.53   | 0.00  | 0.00  | 0.00  | 15.46    | 2.57  | 50.38    | 0.87   | 8.61   | 7.23   | 0.55   | 15.95   | 0.00    | 46.19         | 72.89    | 14439.64 | 11.85         | pos  | 2   | 0    | 2    | 2 |   |
| 16      | 89  | II    | T2   | Nx | neg | neg | 0     | 9.22   | 1.74  | 9.06  | 0.00  | 13.49    | 1.17  | 15.99    | 0.35   | 3.49   | 4.06   | 0.00   | 65.99   | 0.00    | 24.84         | 128.41   | 580.64   | 7.15          | pos  | 0   | 0    | 2    | 2 |   |
| 17      | 62  | II    | T1   | N1 | neg | pos | 0     | 5.06   | 4.05  | 0.00  | 0.00  | 25.59    | 2.24  | 160.37   | 0.11   | 3.37   | 5.07   | 0.00   | 17.26   | 0.00    | 113.01        | 532.08   | 755.59   | 16.33         | pos  | 0   | 0    | 1    | 2 |   |
| 18      | 59  | II    | T2   | N1 | neg | pos | 0     | 0.51   | 0.87  | 7.81  | 0.00  | 7.85     | 0.08  | 158.51   | 0.17   | 0.68   | 3.99   | 0.00   | 8.67    | 0.00    | 22.12         | 65.43    | 522.50   | 6.97          | pos  | 0   | 0    | 1    | 2 |   |
| 19      | 24  | II    | T2   | N1 | neg | pos | 0     | 0.33   | 0.29  | 0.00  | 0.00  | 11.76    | 0.27  | 17.53    | 4.14   | 2.34   | 3.99   | 0.00   | 24.60   | 0.00    | 25.23         | 58.21    | 593.05   | 8.81          | pos  | 0   | 0    | 1    | 2 |   |
| 20      | 41  | II    | T2   | N0 | neg | pos | 0     | 4.13   | 4.92  | 1.10  | 0.00  | 12.57    | 1.79  | 146.76   | 0.40   | 3.49   | 11.57  | 0.28   | 31.61   | 0.00    | 62.13         | 167.43   | 367.71   | 9.94          | pos  | 0   | 0    | 0    | 2 |   |
| 21      | 40  | III   | T2   | N1 | neg | pos | 3+    | 10.90  | 1.45  | 10.01 | 0.00  | 18.22    | 0.94  | 1432.79  | 2.89   | 2.73   | 4.20   | 1.35   | 24.26   | 0.00    | 34.94         | 397.44   | 2520.89  | 7.78          | pos  | 1   | 0    | 2    | 2 |   |
| 22      | 48  | II    | T2   | N1 | neg | pos | 0     | 0.81   | 1.74  | 0.47  | 0.00  | 23.40    | 0.08  | 39.65    | 0.17   | 1.45   | 19.99  | 17.51  | 12.40   | 0.00    | 56.30         | 112.09   | 295.10   | 8.88          | pos  | 1   | 0    | 1    | 2 |   |
| 23      | 47  | II    | T2   | N1 | neg | pos | 3+    | 4.37   | 1.74  | 0.00  | 0.00  | 17.64    | 0.90  | 98.87    | 0.58   | 1.70   | 4.20   | 0.00   | 14.54   | 0.00    | 31.45         | 160.29   | 902.82   | 7.78          | pos  | 1   | 0    | 1    | 2 |   |
| 24      | 71  | II    | T2   | N1 | neg | pos | 0     | 0.00   | 0.01  | 1.41  | 0.00  | 14.87    | 0.45  | 7.26     | 0.29   | 0.94   | 3.59   | 0.00   | 14.77   | 0.00    | 23.68         | 30.49    | 434.54   | 6.79          | pos  | 0   | 0    | 1    | 2 |   |
| 25      | 49  | III   | T2   | N1 | neg | neg | 1+    | 10.81  | 1.74  | 0.00  | 0.00  | 44.25    | 0.00  | 165.25   | 3.94   | 4.00   | 4.26   | 0.00   | 27.20   | 0.00    | 33.78         | 3134.33  | 4394.13  | 10.03         | pos  | 3   | 2    | 2    |   |   |
| 26      | 88  | I     | T2   | N0 | neg | pos | 0     | 280.65 | 4.63  | 20.07 | 0.00  | 4312.47  | 0.81  | 11281.86 | 1.63   | 5.28   | 4.87   | 5.52   | 56.81   | 304.50  | 83.10         | 799.06   | 903.98   | 21.19         | pos  | 0   | 0    | 2    | 2 |   |
| 27      | 78  | II    | T2   | N1 | neg | neg | 0     | 3.66   | 1.16  | 4.35  | 0.00  | 150.58   | 1.84  | 1019.37  | 0.90   | 2.98   | 3.86   | 0.99   | 15.11   | 0.00    | 36.49         | 817.42   | 3116.26  | 10.75         | pos  | 1   | 1    | 1    | 2 |   |
| 28      | 52  | III   | T1   | N0 | neg | neg | 0     | 3.63   | 2.89  | 5.08  | 0.00  | 113.49   | 0.23  | 684.18   | 0.78   | 2.85   | 3.73   | 0.00   | 19.97   | 0.00    | 29.11         | 210.01   | 748.29   | 8.14          | pos  | 1   | 1    | 1    | 2 |   |
| 29      | 37  | III   | T2   | N0 | neg | pos | 3+    | 0.87   | 1.41  | 0.00  | 0.00  | 5.77     | 0.87  | 14.41    | 0.00   | 1.71   | 4.37   | 0.00   | 16.13   | 0.00    | 12.63         | 11.45    | 7.69     | 7.69          | pos  | 1   | 1    | 1    | 2 |   |
| 30      | 70  | III   | T2   | N0 | neg | neg | 0     | 4.57   | 3.47  | 3.82  | 0.00  | 668.63   | 3.09  | 7786.86  | 0.99   | 5.92   | 35.48  | 3.51   | 25.62   | 0.00    | 324.69        | 2691.51  | 5887.26  | 36.31         | pos  | 1   | 1    | 1    | 2 |   |
| 31      | 56  | I     | T1   | N0 | neg | pos | 3+    | 0.00   | 0.00  | 0.00  | 0.00  | 10.84    | 0.00  | 23.69    | 0.00   | 0.00   | 4.13   | 0.00   | 7.09    | 0.00    | 28.73         | 43.75    | 44.81    | 7.15          | pos  | 1   | 1    | 1    | 2 |   |
| 32      | 51  | III   | T2   | N1 | neg | pos | 3+    | 2.55   | 1.74  | 0.00  | 0.00  | 25.87    | 1.74  | 25.87    | 1.74   | 25.87  | 1.74   | 25.87  | 1.74    | 25.87   | 1.74          | 25.87    | 1.74     | 25.87         | 1.74 | pos | 1    | 1    | 1 | 2 |
| 33      | 52  | II    | T1   | N1 | neg | pos | 0     | 24.59  | 42.62 | 0.08  | 0.00  | 93.51    | 8.04  | 117.60   | 4.57   | 19.28  | 52.62  | 46.75  | 103.13  | 489.45  | 277.85        | 294.12   | 12835.00 | 80.00         | ND   | 0   | 0    | 1    | 2 |   |
| 34      | 35  | II    | T1   | N1 | neg | neg | 3+    | 1.52   | 0.29  | 4.77  | 0.00  | 21.56    | 0.81  | 778.36   | 0.20   | 2.09   | 4.87   | 0.00   | 13.30   | 0.00    | 32.22         | 326.29   | 957.31   | 7.96          | neg  | 2   | 0    | 2    | 2 |   |
| 35      | 78  | II    | T4   | N1 | neg | pos | 0     | 0.00   | 0.00  | 0.00  | 0.00  | 17.18    | 3.41  | 5.91     | 0.00   | 0.00   | 3.46   | 0.00   | 8.67    | 0.00    | 19.40         | 14.68    | 42.61    | 6.07          | pos  | 0   | 0    | 1    | 2 |   |
| 36      | 78  | II    | T4   | N1 | neg | pos | 0     | 194.20 | 8.36  | 19.71 | 0.00  | 53.83    | 0.00  | 83.83    | 29.25  | 7.20   | 5.92   | 0.00   | 40.37   | 0.00    | 37.17         | 90       | 9124.34  | 37.21         | pos  | 3   | 2    | 2    |   |   |
| 37      | 47  | I     | T1   | N0 | neg | pos | 0     | 48.90  | 1.16  | 0.00  | 0.00  | 11.53    | 0.23  | 78.52    | 0.03   | 1.45   | 3.39   | 0.00   | 13.87   | 0.00    | 29.11         | 75.37    | 379.87   | 8.50          | pos  | 0   | 0    | 1    | 2 |   |
| 38      | 43  | II    | T1   | N0 | neg | pos | 0     | 2.70   | 0.01  | 5.29  | 0.00  | 8.31     | 0.41  | 5.97     | 0.08   | 2.09   | 3.73   | 0.00   | 13.98   | 0.00    | 24.07         | 30.75    | 478.85   | 6.43          | pos  | 0   | 0    | 1    | 2 |   |
| 39      | 43  | II    | T1   | N0 | neg | pos | 0     | 3.35   | 0.87  | 4.87  | 0.00  | 8.31     | 0.41  | 5.97     | 0.08   | 2.09   | 3.73   | 0.00   | 13.98   | 0.00    | 24.07         | 30.75    | 478.85   | 6.43          | pos  | 0   | 0    | 1    | 2 |   |
| 40      | 53  | I     | T1   | N0 | neg | pos | 0     | 0.35   | 0.01  | 4.87  | 0.00  | 9.81     | 0.36  | 18.62    | 0.26   | 1.32   | 3.33   | 0.00   | 57.48   | 0.00    | 25.23         | 22.84    | 326.82   | 7.15          | pos  | 0   | 0    | 1    | 2 |   |
| 41      | 81  | III   | T1   | N0 | neg | neg | 0     | 0.75   | 1.35  | 0.00  | 0.00  | 208.13   | 8.53  | 3934.77  | 0.08   | 1.45   | 5.25   | 0.00   | 15.17   | 0.00    | 38.46         | 504.70   | 874.13   | 10.65         | pos  | 0   | 0    | 2    | 2 |   |
| 42      | 55  | III   | T2   | N1 | neg | pos | 0     | 9.42   | 2.03  | 6.97  | 0.00  | 147.24   | 1.70  | 472.38   | 1.16   | 3.11   | 4.13   | 2.79   | 18.72   | 0.00    | 30.67         | 478.27   | 4137.89  | 8.59          | pos  | 0   | 1    | 3    | 2 |   |
| 43      | 69  | II    | T1   | N0 | neg | pos | 0     | 1.09   | 3.18  | 1.74  | 0.00  | 13.49    | 1.88  | 33.08    | 0.08   | 3.17   | 4.33   | 0.00   | 13.94   | 0.00    | 24.45         | 414.67   | 610.70   | 6.70          | pos  | 0   | 0    | 2    | 2 |   |
| 44      | 33  | II    | T2   | N0 | neg | neg | 0     |        |       |       |       |          |       |          |        |        |        |        |         |         |               |          |          |               |      |     |      |      |   |   |
